# Supplementary material
Source: PubMed Central journal article supplement (PMC4779497)
Supplement: NIHMS715773-supplement-Supplemental_Material.pdf [file NIHMS715773-supplement-Supplemental_Material.pdf]

**SUPPLEMENTAL MATERIAL**

**Supplementary Table 1—Sex-specific logistic regression models predicting incidence<sup>†</sup> of each risk factor per 5 HU decrement in baseline fat attenuation after adjusting for VAT or BMI**

|                             | <b>WOMEN</b>                |          |                             |          | <b>MEN</b>                  |          |                             |          |
|-----------------------------|-----------------------------|----------|-----------------------------|----------|-----------------------------|----------|-----------------------------|----------|
|                             | <b>MV<sup>‡</sup> + VAT</b> | <b>p</b> | <b>MV<sup>‡</sup> + BMI</b> | <b>p</b> | <b>MV<sup>‡</sup> + VAT</b> | <b>p</b> | <b>MV<sup>‡</sup> + BMI</b> | <b>p</b> |
| <b>Diabetes</b>             |                             |          |                             |          |                             |          |                             |          |
| <b>SAT HU</b>               | 1.19 (0.53 ,2.65)           | 0.67     | 1.27 (0.59 ,2.70)           | 0.54     | 1.01 (0.55 ,1.82)           | 0.99     | 0.89 (0.51 ,1.57)           | 0.70     |
| <b>VAT HU</b>               | 0.59 (0.21 ,1.64)           | 0.31     | 1.09 (0.52 ,2.29)           | 0.82     | 0.92 (0.45 ,1.87)           | 0.81     | 1.16 (0.65 ,2.09)           | 0.61     |
| <b>Hypertension</b>         |                             |          |                             |          |                             |          |                             |          |
| <b>SAT HU</b>               | 1.19 (0.85 ,1.66)           | 0.31     | 1.20 (0.86 ,1.67)           | 0.28     | 0.75 (0.56 ,1.02)           | 0.06     | 0.87 (0.66 ,1.15)           | 0.33     |
| <b>VAT HU</b>               | 1.31 (0.81 ,2.10)           | 0.27     | 1.33 (0.90 ,1.95)           | 0.15     | 0.81 (0.53 ,1.23)           | 0.31     | 1.19 (0.89 ,1.60)           | 0.24     |
| <b>Low HDL</b>              |                             |          |                             |          |                             |          |                             |          |
| <b>SAT HU</b>               | 1.15 (0.65 ,2.04)           | 0.64     | 1.13 (0.64 ,2.01)           | 0.67     | 0.66 (0.43 ,1.02)           | 0.06     | 0.67 (0.45 ,1.00)           | 0.049    |
| <b>VAT HU</b>               | 1.02 (0.42 ,2.48)           | 0.96     | 1.07 (0.54 ,2.12)           | 0.84     | 0.42 (0.22 ,0.81)           | 0.01     | 0.69 (0.44 ,1.09)           | 0.11     |
| <b>Metabolic Syndrome</b>   |                             |          |                             |          |                             |          |                             |          |
| <b>SAT HU</b>               | 1.69 (1.13 ,2.51)           | 0.01     | 1.89 (1.30 ,2.77)           | 0.001    | 0.73 (0.55 ,0.98)           | 0.04     | 0.82 (0.63 ,1.08)           | 0.16     |
| <b>VAT HU</b>               | 1.20 (0.74 ,1.95)           | 0.47     | 2.10 (1.45 ,3.04)           | <0.0001  | 0.82 (0.54 ,1.25)           | 0.36     | 1.36 (1.01 ,1.82)           | 0.04     |
| <b>Hypertriglyceridemia</b> |                             |          |                             |          |                             |          |                             |          |
| <b>SAT HU</b>               | 1.33 (0.97 ,1.83)           | 0.08     | 1.40 (1.02 ,1.92)           | 0.04     | 0.78 (0.60 ,1.01)           | 0.06     | 0.81 (0.63 ,1.04)           | 0.09     |
| <b>VAT HU</b>               | 1.27 (0.83 ,1.94)           | 0.27     | 1.40 (1.00 ,1.97)           | 0.05     | 0.74 (0.51 ,1.09)           | 0.13     | 0.92 (0.70 ,1.23)           | 0.59     |

† Estimates are odds ratios (95% CI) for the condition for a 5 unit decrement in HU (more negative).

‡ MV model adjusted for age, physical activity, alcohol intake, smoking status, menopausal status (Women only), and Hormone Replacement Therapy (Women only). Diabetes models were additionally adjusted for fasting glucose (at baseline). Hypertension model was additionally adjusted for baseline SBP and baseline DBP. Low HDL models and Hypertriglyceridemia models were additionally adjusted for baseline HDL and baseline log triglycerides, respectively.

**Supplementary Table 2—Sex-specific linear regression models predicting change<sup>†</sup> in each outcome per 5 HU decrement in baseline fat attenuation after adjustment for either VAT or BMI**

|                          | WOMEN                 |         |                       |        | MEN                   |      |                       |       |
|--------------------------|-----------------------|---------|-----------------------|--------|-----------------------|------|-----------------------|-------|
|                          | MV <sup>‡</sup> + VAT | p       | MV <sup>‡</sup> + BMI | p      | MV <sup>‡</sup> + VAT | p    | MV <sup>‡</sup> + BMI | p     |
| <b>SBP</b>               |                       |         |                       |        |                       |      |                       |       |
| <b>SAT HU</b>            | 1.64 (0.73 ,2.54)     | 0.0004  | 1.66 (0.77 ,2.54)     | 0.0003 | -0.12 (-1.00 ,0.76)   | 0.79 | 0.35 (-0.49 ,1.19)    | 0.41  |
| <b>VAT HU</b>            | -0.61 (-2.11 ,0.89)   | 0.43    | 0.28 (-0.96 ,1.51)    | 0.66   | 0.65 (-0.61 ,1.92)    | 0.31 | 1.39 (0.49 ,2.29)     | 0.003 |
| <b>DBP</b>               |                       |         |                       |        |                       |      |                       |       |
| <b>SAT HU</b>            | 1.04 (0.44 ,1.63)     | 0.0007  | 1.10 (0.52 ,1.69)     | 0.0002 | 0.24 (-0.38 ,0.86)    | 0.45 | 0.40 (-0.19 ,0.99)    | 0.18  |
| <b>VAT HU</b>            | -1.15 (-2.13 ,-0.17)  | 0.02    | -0.28 (-1.10 ,0.54)   | 0.50   | 0.44 (-0.46 ,1.33)    | 0.34 | 0.67 (0.03 ,1.31)     | 0.04  |
| <b>Glucose</b>           |                       |         |                       |        |                       |      |                       |       |
| <b>SAT HU</b>            | 0.23 (-0.61 ,1.06)    | 0.60    | 0.72 (-0.10 ,1.55)    | 0.09   | 0.82 (-0.49 ,2.13)    | 0.22 | 1.03 (-0.24 ,2.30)    | 0.11  |
| <b>VAT HU</b>            | 0.65 (-0.73 ,2.04)    | 0.36    | 2.18 (1.04 ,3.32)     | 0.0002 | 1.40 (-0.44 ,3.24)    | 0.14 | 1.68 (0.37 ,2.99)     | 0.01  |
| <b>HDL</b>               |                       |         |                       |        |                       |      |                       |       |
| <b>SAT HU</b>            | -2.25 (-3.10 ,-1.39)  | <0.0001 | -2.47 (-3.31 ,-1.62)  | <.0001 | -0.39 (-1.20 ,0.42)   | 0.35 | -0.20 (-0.98 ,0.59)   | 0.63  |
| <b>VAT HU</b>            | -0.73 (-2.19 ,0.74)   | 0.33    | -1.61 (-2.83 ,-0.40)  | 0.01   | 0.44 (-0.75 ,1.64)    | 0.47 | 0.20 (-0.67 ,1.08)    | 0.65  |
| <b>Log Triglycerides</b> |                       |         |                       |        |                       |      |                       |       |
| <b>SAT HU</b>            | 0.04 (0.01 ,0.07)     | 0.003   | 0.05 (0.02 ,0.08)     | 0.0002 | -0.00 (-0.04 ,0.03)   | 0.82 | -0.01 (-0.04 ,0.03)   | 0.74  |
| <b>VAT HU</b>            | 0.06 (0.02 ,0.11)     | 0.005   | 0.08 (0.04 ,0.12)     | <.0001 | -0.02 (-0.07 ,0.03)   | 0.37 | -0.01 (-0.04 ,0.03)   | 0.69  |

<sup>†</sup> Estimates are change in the parameter (exam 2 value – exam 1 value) for a 5 unit decrement in HU (more negative).

<sup>‡</sup> MV model adjusted for age, physical activity, alcohol intake, smoking status, menopausal status (Women only), and Hormone Replacement Therapy (Women only). Additional covariates included Exam 1 values of the parameter. SBP and DBP models excluded participants on hypertensive medications at baseline (and imputed +10/+5 if patient was on hypertension medications at Exam 2). Other models excluded participants on diabetes medications or lipid lowering medications (as appropriate).
